# Supplementary material for: Quantifying similarity between motifs
Source: PubMed Central journal article supplement (PMC1852410; doi:10.1186/gb-2007-8-2-r24), 2007-02-26
Supplement: gb-2007-8-2-r24-S6.pdf [file gb-2007-8-2-r24-S6.pdf]

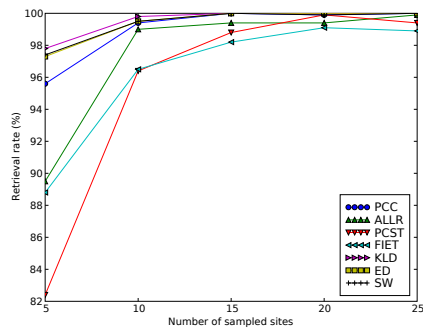

(A)  $E\text{-value} < 0.05$

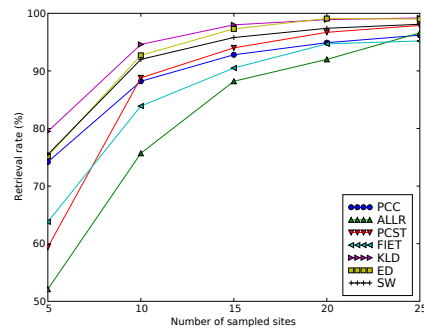

(B)  $E\text{-value} < 0.001$

Figure 4:  **$E\text{-value}$  based retrieval rate.** The figure plots the percentage of query motifs that successfully matched the correct JASPAR target as a function of the number of sites used to create the query motif. Here “success” means that the top-ranked motif is the correct target and has an  $E\text{-value}$  less than 0.05 (panel A) or 0.001 (panel B).
